# Supplementary material for: IL-10 Gene Polymorphisms and IL-10 Serum Levels in Patients with Multiple Sclerosis in Lithuania
Source: MDPI journal article supplement (doi:10.3390/brainsci12060800), 2022-06-18
Supplement: s1 [file s1]

**Supplementary Materials:**

**Table S1.** Binary logistic regression analysis of *IL-10* rs1800871, rs1800872, and rs1800896 genotypes.

| <b><i>IL-10</i> (rs1800871):</b> |                        |                       |                       |            |
|----------------------------------|------------------------|-----------------------|-----------------------|------------|
| <b>Genetic Model</b>             | <b>Genotype/Allele</b> | <b>OR (95% CI)</b>    | <b><i>p</i>-Value</b> | <b>AIC</b> |
| Codominant                       | AG vs. GG              | 0.755 (0.352–1.622)   | 0.472                 | 167.376    |
|                                  | AA vs. GG              | 1.091 (0.0.206–5.787) | 0.919                 |            |
| Dominant                         | AG+AA vs. GG           | 0.790 (0.379–1.646)   | 0.529                 | 165.553    |
| Recessive                        | AA vs. GG+AG           | 1.216 (0.235–6.284)   | 0.816                 | 165.897    |
| Overdominant                     | AG vs. AA+GG           | 0.750 (0.353–1.592)   | 0.454                 | 165.386    |
| Additive                         | G                      | 0.872 (0.472–1.610)   | 0.661                 | 165.757    |
| <b><i>IL-10</i> (rs1800872):</b> |                        |                       |                       |            |
| Codominant                       | TG vs. GG              | 0.923 (0.433–1.970)   | 0.836                 | 167.495    |
|                                  | TT vs. GG              | 1.600 (0.332–7.717)   | 0.558                 |            |
| Dominant                         | TG+TT vs. GG           | 0.993 (0.480–2.053)   | 0.985                 | 165.950    |
| Recessive                        | TT vs. GG + TG         | 1.653 (0.354–7.732)   | 0.523                 | 165.537    |
| Overdominant                     | TG vs. GG + TT         | 0.882 (0.420–1.854)   | 0.741                 | 165.841    |
| Additive                         | G                      | 1.074 (0.592–1.946)   | 0.814                 | 165.896    |
| <b><i>IL-10</i> (rs1800896):</b> |                        |                       |                       |            |
| Codominant                       | TC vs. TT              | 1.294 (0.796–2.103)   | 0.299                 | 490.351    |
|                                  | CC vs. TT              | 1.562 (0.866–2.820)   | 0.138                 |            |
| Dominant                         | TC + CC vs. TT         | 1.372 (0.870–2.161)   | 0.173                 | 489.808    |
| Recessive                        | CC vs. TT + TC         | 1.340 (0.803–2.235)   | 0.263                 | 489.437    |
| Overdominant                     | TC vs. TT + CC         | 1.082 (0.711–1.647)   | 0.713                 | 488.549    |
| Additive                         | T                      | 1.254 (0.936–1.680)   | 0.130                 | 488.377    |

*p*-value – significance level (statistically significant when  $p < 0.05$ ); OR – odds ratio; AIC – Akaike information criterion. *p*-values, if statistically significant, are marked in bold.

**Table S2.** Binary logistic regression analysis of *IL-10* rs1800871, rs1800872, and rs1800896 genotypes in males.

| <b><i>IL-10</i> (rs1800871):</b> |                        |                     |                       |            |
|----------------------------------|------------------------|---------------------|-----------------------|------------|
| <b>Genetic Model</b>             | <b>Genotype/Allele</b> | <b>OR (95% CI)</b>  | <b><i>p</i>-Value</b> | <b>AIC</b> |
| Codominant                       | AG vs. GG              | 0.755 (0.352–1.622) | 0.472                 | 167.376    |
|                                  | AA vs. GG              | 1.091 (0.206–5.787) | 0.919                 |            |
| Dominant                         | AG + AA vs. GG         | 0.790 (0.379–1.646) | 0.529                 | 165.553    |
| Recessive                        | AA vs. GG + AG         | 1.216 (0.235–6.284) | 0.816                 | 165.897    |
| Overdominant                     | AG vs. AA + GG         | 0.750 (0.353–1.592) | 0.454                 | 165.386    |
| Additive                         | G                      | 0.872 (0.472–1.610) | 0.661                 | 165.757    |
| <b><i>IL-10</i> (rs1800872):</b> |                        |                     |                       |            |
| Codominant                       | TG vs. GG              | 0.923 (0.433–1.970) | 0.836                 | 167.495    |
|                                  | TT vs. GG              | 1.600 (0.332–7.717) | 0.558                 |            |
| Dominant                         | TG + TT vs. GG         | 0.993 (0.480–2.053) | 0.985                 | 165.950    |
| Recessive                        | TT vs. GG + TG         | 1.653 (0.354–7.732) | 0.523                 | 165.537    |
| Overdominant                     | TG vs. GG + TT         | 0.882 (0.420–1.854) | 0.741                 | 165.841    |
| Additive                         | G                      | 1.074 (0.592–1.946) | 0.814                 | 165.896    |
| <b><i>IL-10</i> (rs1800896):</b> |                        |                     |                       |            |
| Codominant                       | TC vs. TT              | 0.958 (0.410–2.237) | 0.920                 | 167.924    |
|                                  | CC vs. TT              | 1.029 (0.380–2.789) | 0.955                 |            |

|              |                |                     |       |         |
|--------------|----------------|---------------------|-------|---------|
| Dominant     | TC + CC vs. TT | 0.981 (0.444–2.165) | 0.962 | 165.949 |
| Recessive    | CC vs. TT + TC | 1.057 (0.452–2.472) | 0.898 | 165.934 |
| Overdominant | TC vs. TT + CC | 0.945 (0.459–1.949) | 0.879 | 165.928 |
| Additive     | T              | 1.011 (0.615–1.664) | 0.964 | 165.949 |

**Table S3.** Binary logistic regression analysis of *IL-10* rs1800871, rs1800872, and rs1800896 genotypes in females.

| <b><i>IL-10</i> (rs1800871):</b> |                        |                     |                       |            |
|----------------------------------|------------------------|---------------------|-----------------------|------------|
| <b>Genetic Model</b>             | <b>Genotype/Allele</b> | <b>OR (95% CI)</b>  | <b><i>p</i>-Value</b> | <b>AIC</b> |
| Codominant                       | AG vs. GG              | 0.915 (0.532–1.574) | 0.749                 | 325.689    |
|                                  | AA vs. GG              | 0.439 (0.116–1.668) | 0.227                 |            |
| Dominant                         | AG + AA vs. GG         | 0.843 (0.499–1.424) | 0.523                 | 324.923    |
| Recessive                        | AA vs. GG + AG         | 0.455 (0.122–1.698) | 0.241                 | 323.792    |
| Overdominant                     | AG vs. AA + GG         | 0.975 (0.571–1.662) | 0.925                 | 325.323    |
| Additive                         | G                      | 0.803 (0.517–1.246) | 0.327                 | 324.359    |
| <b><i>IL-10</i> (rs1800872):</b> |                        |                     |                       |            |
| Codominant                       | TG vs. GG              | 0.900 (0.522–1.552) | 0.705                 | 323.648    |
|                                  | TT vs. GG              | 0.437 (0.115–1.658) | 0.224                 |            |
| Dominant                         | TG + TT vs. GG         | 0.829 (0.490–1.402) | 0.484                 | 324.841    |
| Recessive                        | TT vs. GG + TG         | 0.455 (0.122–1.698) | 0.241                 | 323.792    |
| Overdominant                     | TG vs. GG + TT         | 0.958 (0.560–1.639) | 0.876                 | 325.307    |
| Additive                         | G                      | 0.793 (0.510–1.233) | 0.304                 | 324.257    |
| <b><i>IL-10</i> (rs1800896):</b> |                        |                     |                       |            |
| Codominant                       | TC vs. TT              | 1.479 (0.813–2.688) | 0.200                 | 324.132    |
|                                  | CC vs. TT              | 1.895 (0.906–3.965) | 0.089                 |            |
| Dominant                         | TC + CC vs. TT         | 1.592 (0.909–2.789) | 0.104                 | 322.635    |
| Recessive                        | CC vs. TT + TC         | 1.503 (0.791–2.858) | 0.214                 | 323.797    |
| Overdominant                     | TC vs. TT + CC         | 1.159 (0.690–1.945) | 0.578                 | 325.021    |
| Additive                         | T                      | 1.387 (0.964–1.996) | 0.078                 | 322.202    |
